# Supplementary material
Source: publisher figshare collection journal article supplement (https://acs.figshare.com/ndownloader/files/31066132)
Supplement: Supplementary file 1 [file 31066132]

## Supporting Information

# A Highly Permeable Mixed Matrix Membrane Containing Vertically Aligned Metal-organic Framework for CO<sub>2</sub> Separation

*Jia Wang, Yinghui Xu, Hongqiang Qu, Haiyun Ma, Ran Chang\* and Jing Ma\**

College of Chemistry and Environmental Science, Hebei University, Baoding 071002,

China

E-mail: hbdxcr@163.com; [majing\\_hbu@126.com](mailto:majing_hbu@126.com)

## **Contents**

1. Schematic illustration of the gas permeation equipment.
2. SEM images of ZnO nanowire without the addition of GO and with the addition of GO.
3. SEM images of the prepared V-ZIF-8 with different ratio of GO: ZnO.
4. EDX spectrum of V-ZIF-8/PSF membrane.
5. Element contents of the V-ZIF-8/PSF membrane.

1.

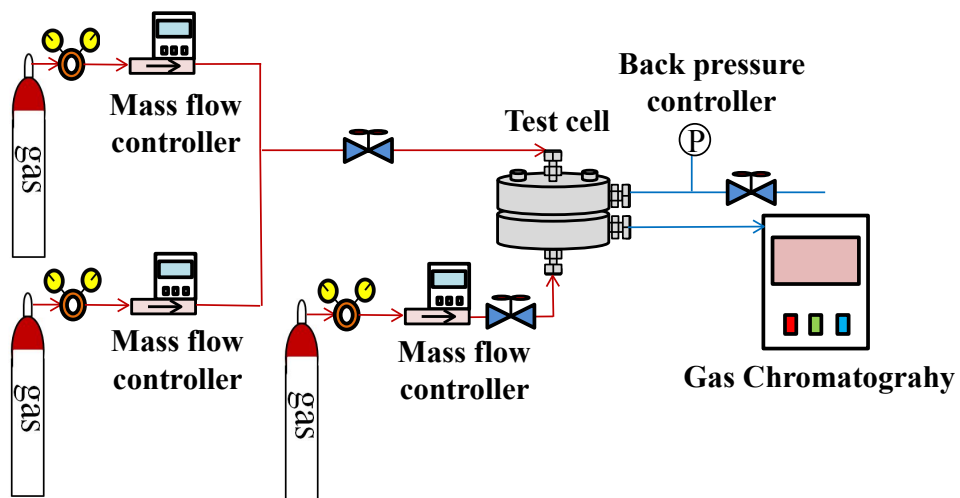

Scheme S1. Schematic illustration of the gas permeation equipment.

2.

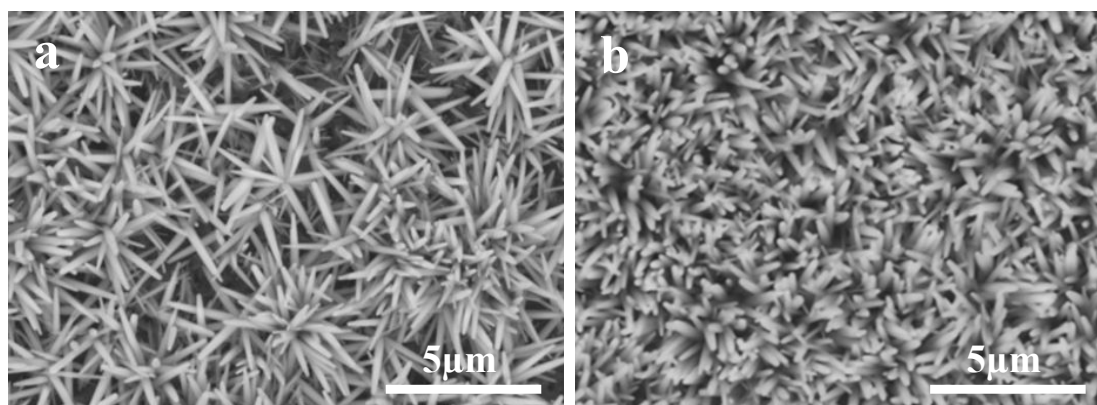

Figure S1. SEM images of ZnO nanowire without the addition of GO (a), and with the addition of GO (b).

3.

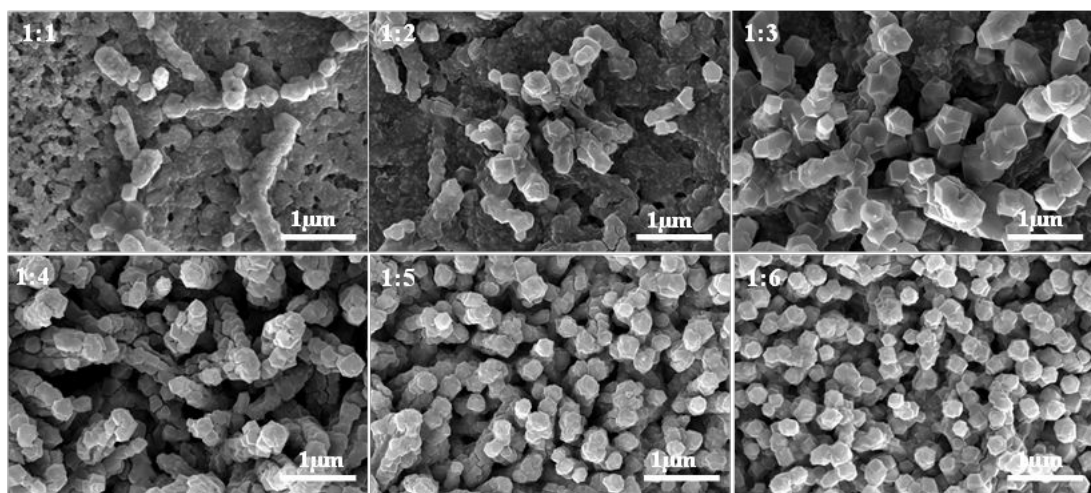

Figure S2. SEM images of the prepared V-ZIF-8 with different ratio of GO: ZnO.

4.

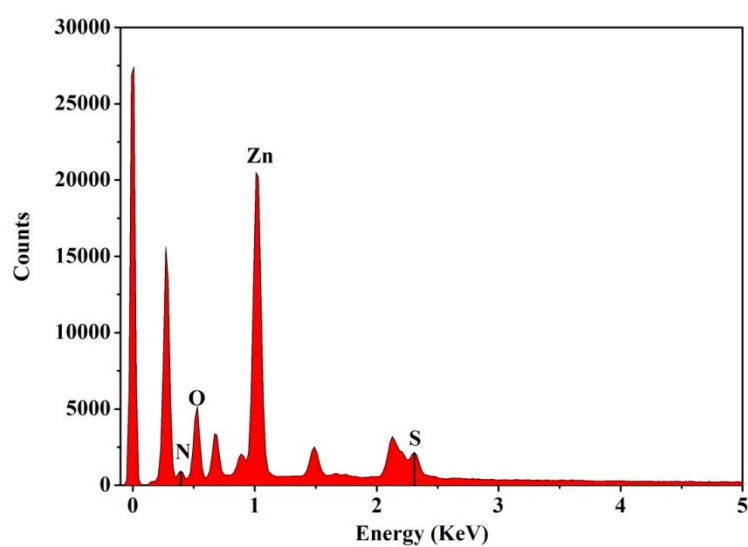

Figure S3 EDX spectrum of the V-ZIF-8/PSF membrane

5.

Table S1 Element contents of the V-ZIF-8/PSF membrane

| Element | wt%   |
|---------|-------|
| Zn      | 23.92 |
| O       | 51.63 |
| N       | 19.49 |
| S       | 4.96  |
